# Supplementary material for: Diagnostic efficacy of circular RNAs as noninvasive, liquid biopsy biomarkers for early detection of gastric cancer
Source: PubMed Central journal article supplement (PMC8826675; doi:10.1186/s12943-022-01527-7), 2022-02-09

# SUPPLEMENTARY FIGURE 1

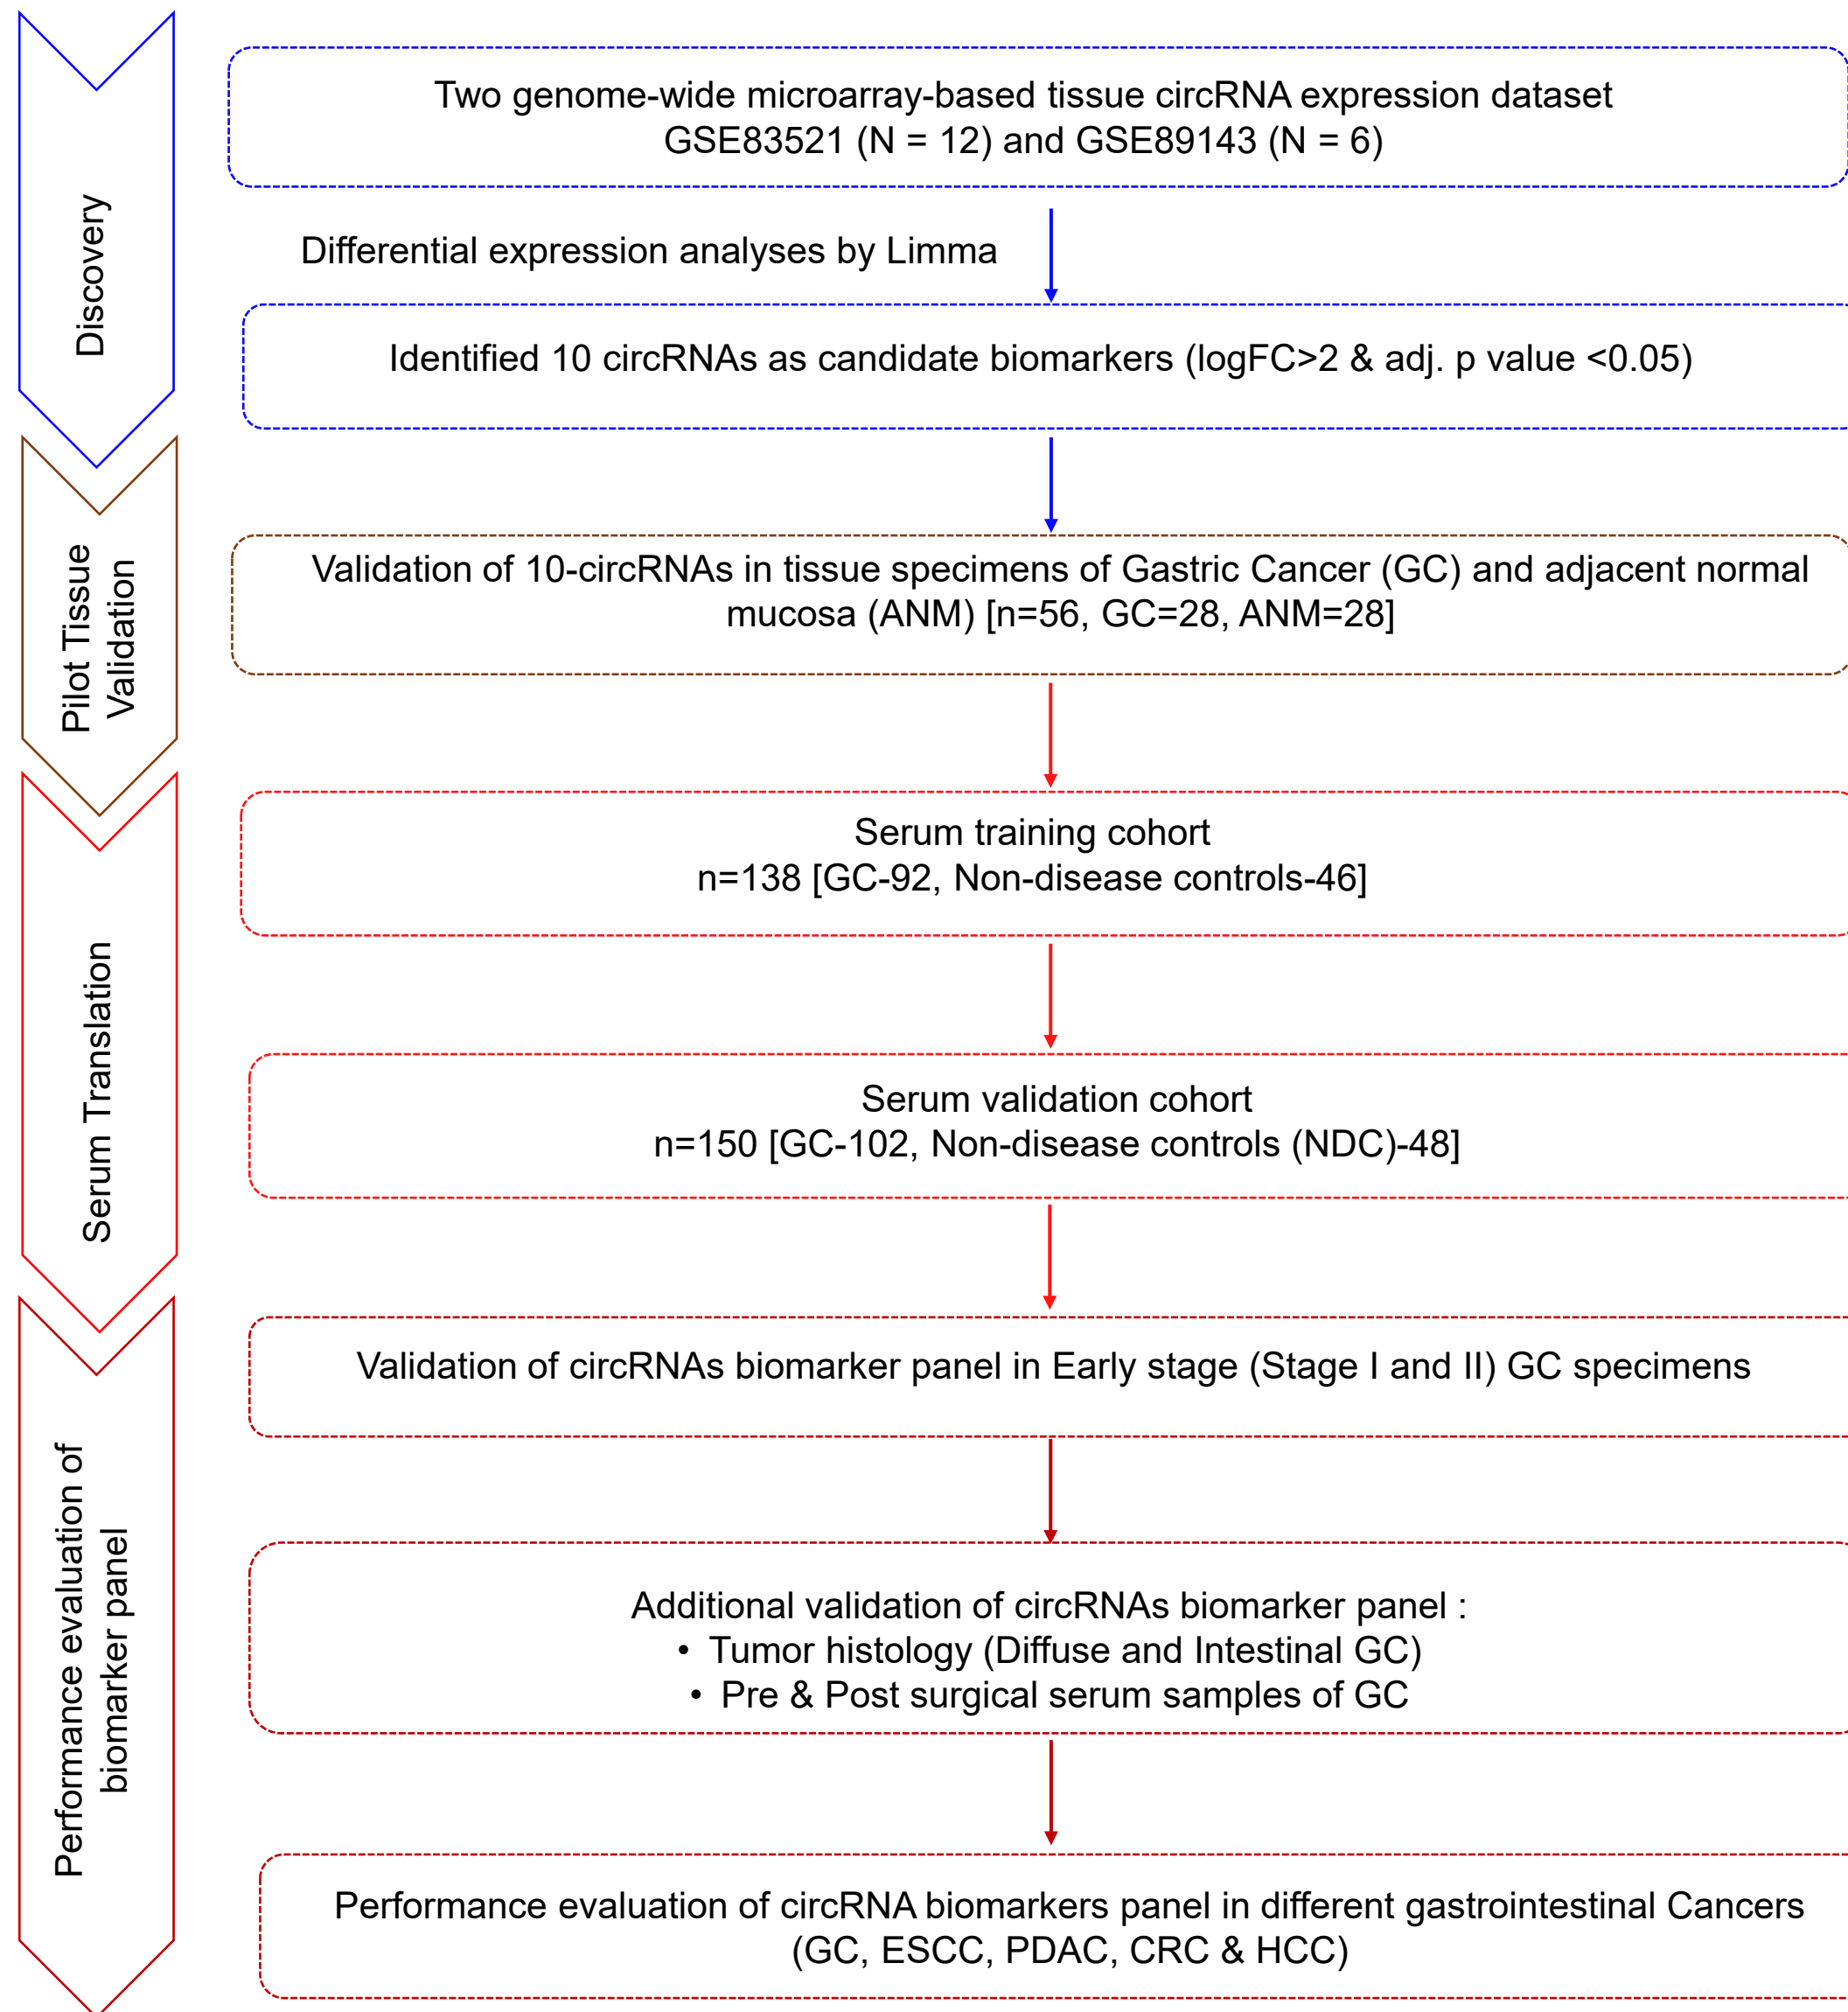

# SUPPLEMENTARY FIGURE 2

## A

### Decision Curve Analysis

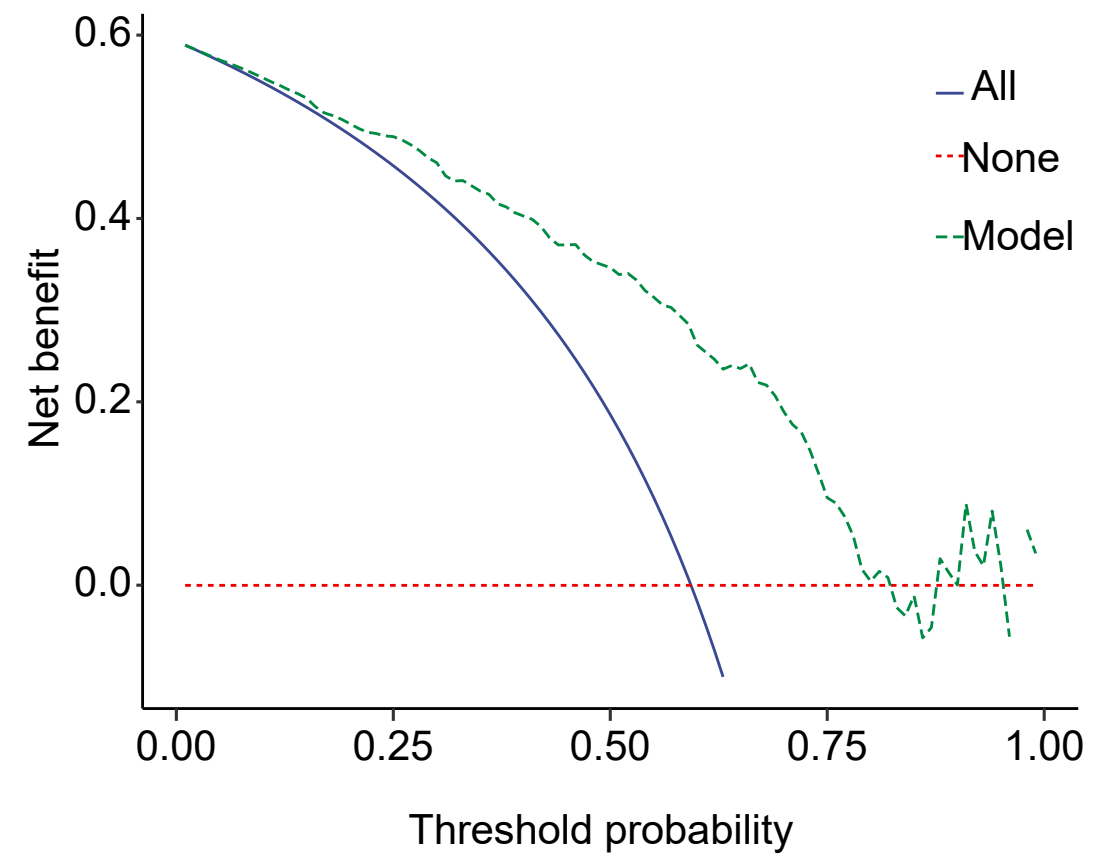

## B

### Calibration analysis

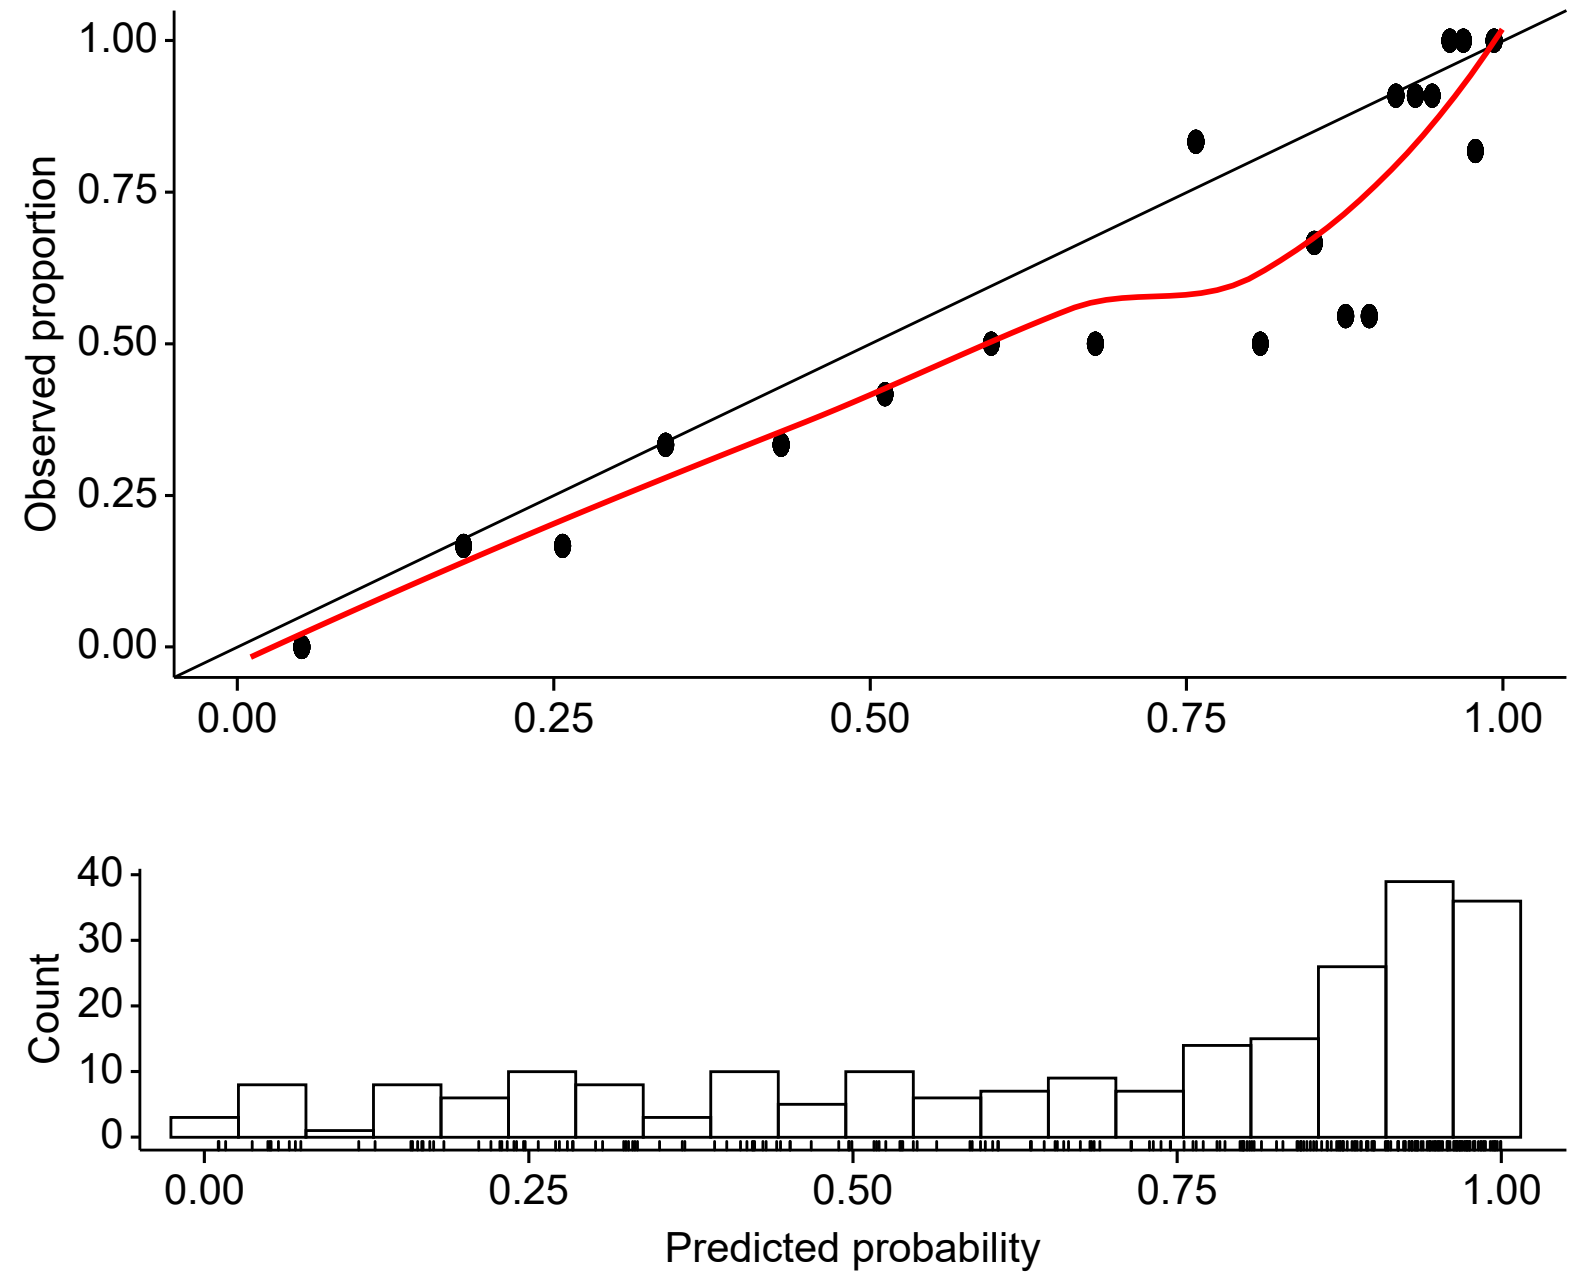

Supplement: 12943_2022_1527_MOESM1_ESM.pdf [file 12943_2022_1527_MOESM1_ESM.pdf]
